# Supplementary material
Source: PubMed Central journal article supplement (PMC2859493)
Supplement: supp_M109.074286_jbc.M109.074286-1.pdf [file supp_M109.074286_jbc.M109.074286-1.pdf]

Supplemental Fig.1

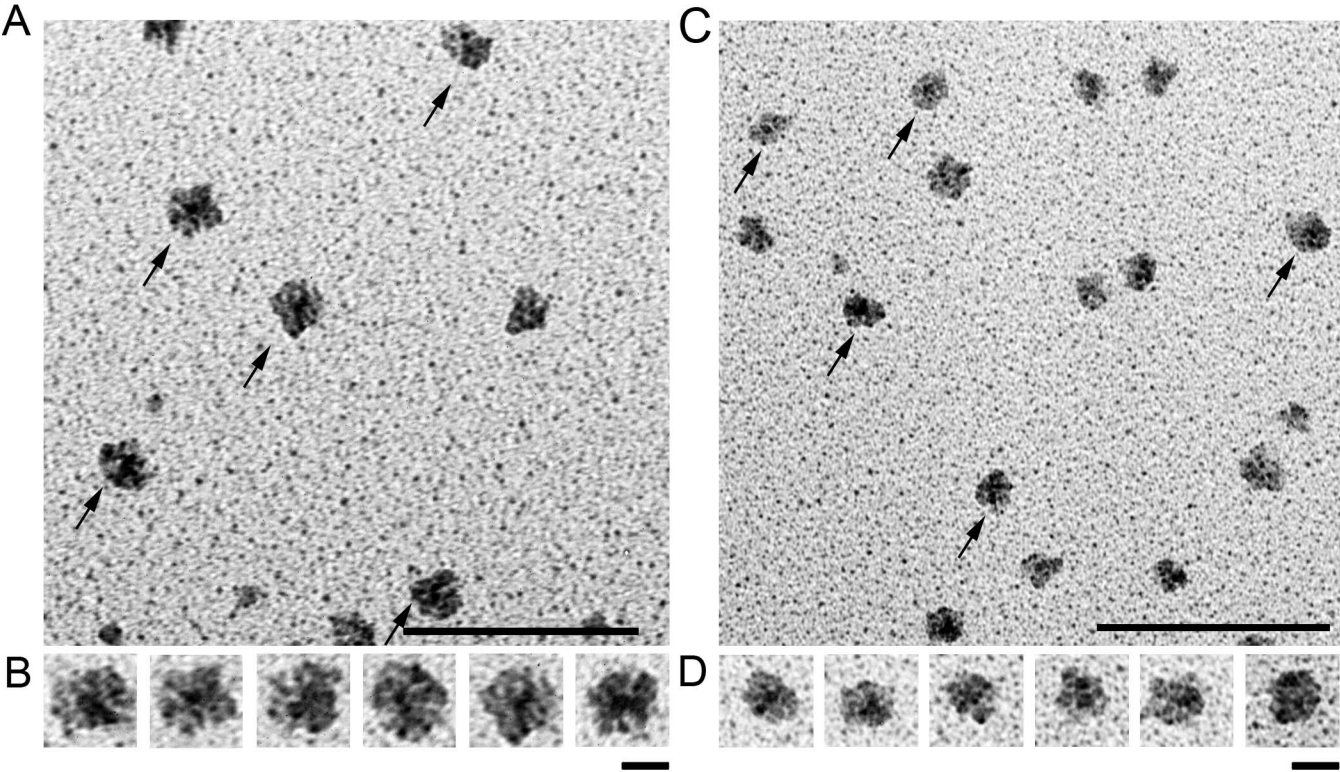

Visualization of BCDX2 or CX3 complexes by glycerol spray/low voltage EM. A suspension of purified BCDX2 (A and B) or CX3 (C and D) in glycerol were sprayed onto carbon coated copper grids, dried in vacuo, and rotary shadowcast with tungsten as described in materials and methods. Samples were visualized on a Tecnai 12 EM. A, A field of BCDX2 complexes showing a uniform structure; B, an enlarged panel of individual BCDX2 complexes. C, A field of CX3 complexes showing a uniform structure; D, a enlarged panel of individual CX3 complexes. Bar is 100nm in A and C and 12nm in B and D.
